# Supplementary material
Source: PubMed Central journal article supplement (PMC3309550)
Supplement: tp20129x1.pdf [file tp20129x1.pdf]

## Supplemental Figure S1

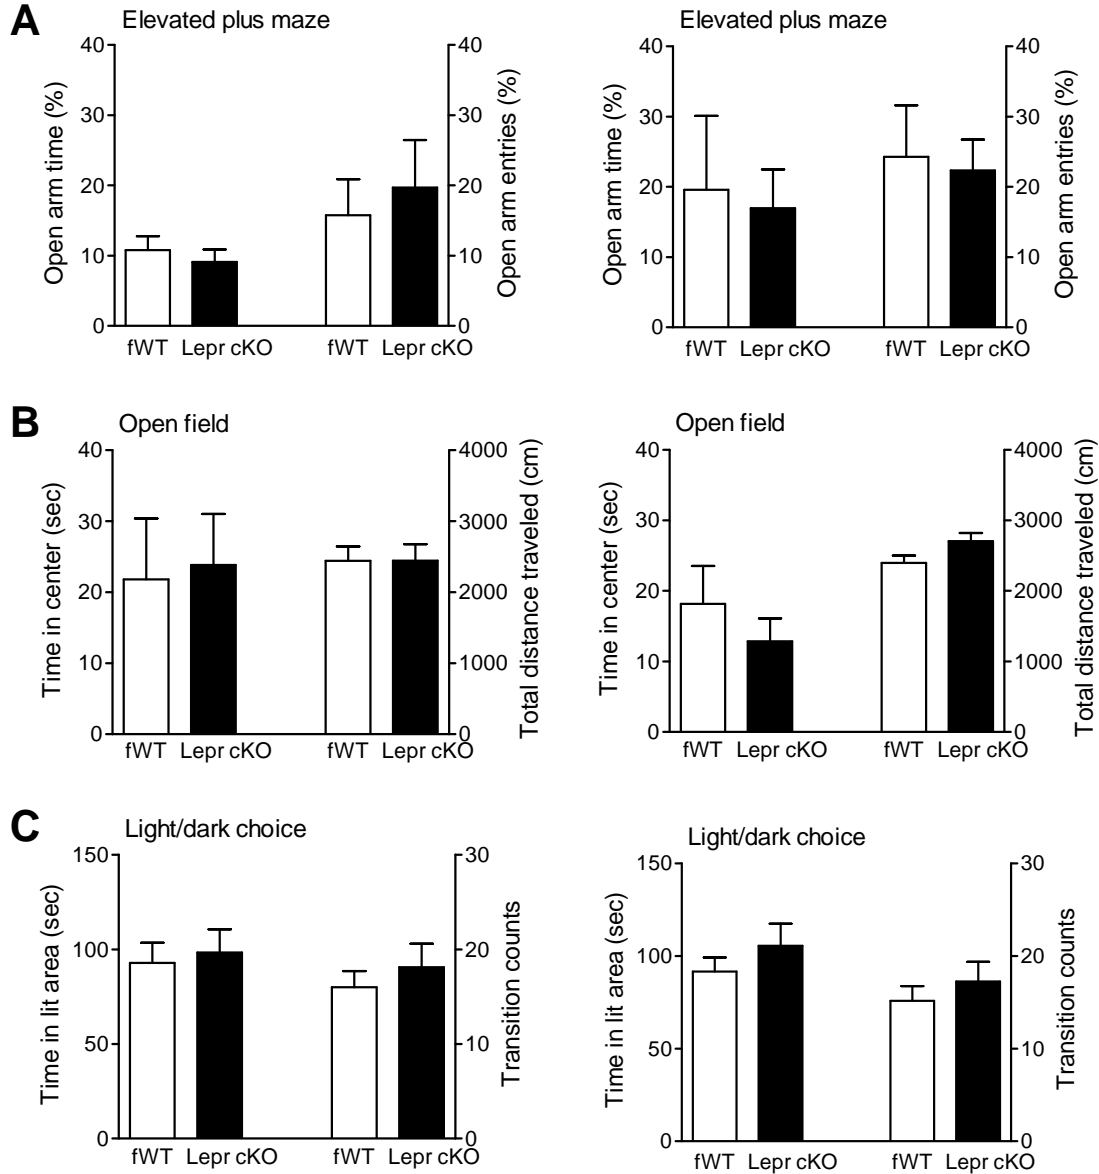

**Supplemental Figure S1.** Lepr cKO mice exhibit normal anxiety-like behaviors. Both male and female fWT and Lepr cKO mice were allowed to explore for 5 min in three testing apparatuses to assess anxiety-like behaviors. Left panels in A-C, males; right panels in A-C, females. (A) The elevated plus maze. The percentage of entries made into the open arms/total entries made into all arms and the percentage of time spent in the open arms/total time spent in all arms were calculated.  $n = 7-9$  per group. (B) The open field test. The time spent in the center area and the total distance traveled in the entire open field were measured.  $n = 8-11$  per group. (C) The light/dark choice. The time spent in the lighted compartment and the number of transitions between light and dark compartments were measured.  $n = 8-13$  per group. All data are presented as mean  $\pm$  SEM.

## Supplemental Figure S2

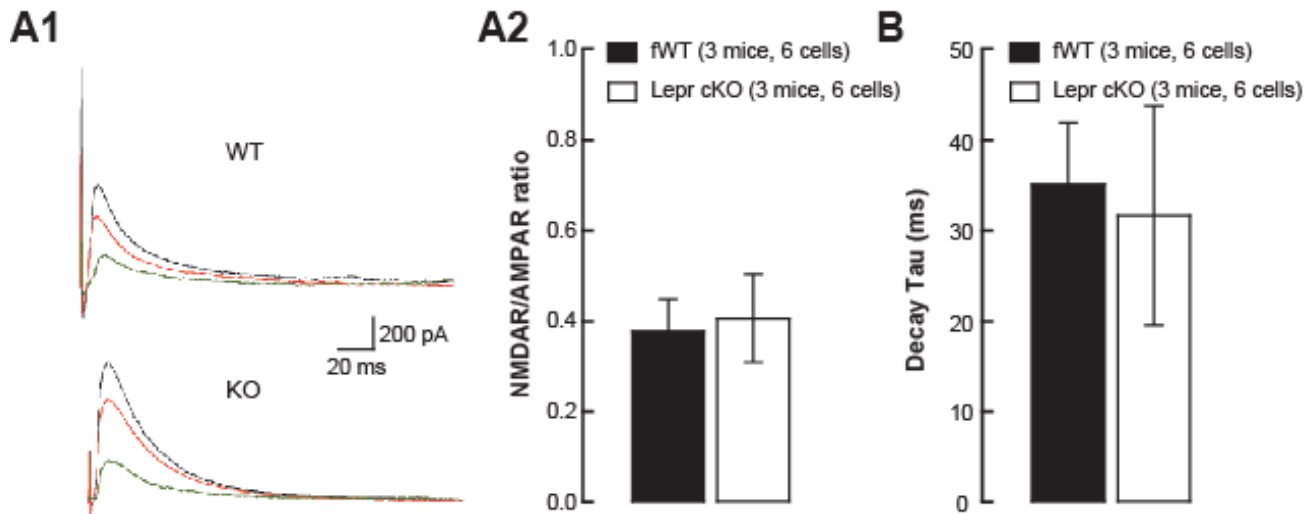

**Supplemental Figure S2.** NMDA receptor property is unaltered in adult Lepr cKO mice (8-12 week old). (A1) shows recorded traces at +40 mV: black traces are the evoked EPSCs recorded under control condition; red traces are the AMPAR- evoked EPSCs recorded in the presence of 100 mM D-APV; green traces are the NMDAR evoked EPSCs computed by subtraction of AMPAR evoked EPSCs (red trace) from the control evoked EPSCs (black trace). (A2) Ratio of NMDAR- to AMPAR- mediated EPSCs in Lepr cKO mice ( $0.41 \pm 0.09$ ) is not distinguishable from littermate controls ( $0.38 \pm 0.07$ ). (B) The decay tau of NMDAR-mediated EPSCs in Lepr cKO mice ( $31.7 \pm 12.1$  msec) is comparable with littermate controls ( $35.1 \pm 6.8$  msec). Data are presented as mean  $\pm$  SEM.
